# Supplementary material
Source: publisher site journal article supplement (https://www.dovepress.com/get_supplementary_file.php?f=330591.docx)
Supplement: Supplementary file 1 [file get_supplementary_file.php]

**Supplementary Materials**

All contents of the supplementary materials are in this document. This document contains all the parameter settings for our machine-learning models. Parameter settings link is (<https://share.streamlit.io/liuwencaincu/prostate-cancer/main/prostate.py>). The risk of BM from PCa could be easily predicted by simply setting the variables in the sidebar of the web page.

Readers can also use these detailed parameter settings to reproduce our model with *Python software*. The *XGB.pickle* file and *model_parameter_settings.txt* can also be downloaded from the following publicly available github repositories. ( <https://github.com/liuwencaincu/prostate_file>)

DT

DecisionTreeClassifier(

*,

criterion='entropy',

splitter='best',

max_depth=5,

min_samples_split=2,

min_samples_leaf=1,

min_weight_fraction_leaf=0.0,

max_features='log2',

random_state=None,

max_leaf_nodes=None,

min_impurity_decrease=0.0,

min_impurity_split=None,

class_weight=None,

ccp_alpha=0.0,

)

*# Each line in parentheses represents a specific mathematical parameter setting for the model.*

LR

LogisticRegression(

penalty='l2',

*,

dual=False,

tol=0.0001,

C=1.0,

fit_intercept=True,

intercept_scaling=1,

class_weight=None,

random_state=None,

solver='liblinear',

max_iter=100,

multi_class='auto',

verbose=0,

warm_start=False,

n_jobs=None,

l1_ratio=None,

)

MLP

MLPClassifier(

hidden_layer_sizes=(100,),

activation='relu',

*,

solver='lbfgs',

alpha=0.0001,

batch_size='auto',

learning_rate='constant',

learning_rate_init=0.001,

power_t=0.5,

max_iter=200,

shuffle=True,

random_state=None,

tol=0.0001,

verbose=False,

warm_start=False,

momentum=0.9,

nesterovs_momentum=True,

early_stopping=False,

validation_fraction=0.1,

beta_1=0.9,

beta_2=0.999,

epsilon=1e-08,

n_iter_no_change=10,

max_fun=15000,

)

NBC

GaussianNB(

*,

priors=None,

var_smoothing=1e-05

)

RF

sklearn.ensemble.RandomForestClassifier(

n_estimators=21,

*,

criterion='entropy',

max_depth=5,

min_samples_split=2,

min_samples_leaf=1,

min_weight_fraction_leaf=0.0,

max_features='auto',

max_leaf_nodes=None,

min_impurity_decrease=0.0,

min_impurity_split=None,

bootstrap=True,

oob_score=False,

n_jobs=None,

random_state=None,

verbose=0,

warm_start=False,

class_weight=None,

ccp_alpha=0.0,

max_samples=None,

)

XGB

XGBClassifier(

base_score=0.5,

booster='gbtree',

colsample_bylevel=1,

colsample_bynode=1,

colsample_bytree=1,

gamma=0,

gpu_id=-1,

importance_type='gain',

interaction_constraints='',

learning_rate=0.300000012,

max_delta_step=0,

max_depth=3,

min_child_weight=1,

missing=nan,

monotone_constraints='()',

n_estimators=34,

n_jobs=8,

num_parallel_tree=1,

reg_alpha=0,

reg_lambda=1,

scale_pos_weight=1,

subsample=1,

tree_method='exact',

validate_parameters=1,

verbosity=None

)
